# Supplementary material for: Risk of pneumonia among residents living near goat and poultry farms during 2014-2016
Source: PLoS One. 2019 Oct 14;14(10):e0223601. doi: 10.1371/journal.pone.0223601 (PMC6791541; doi:10.1371/journal.pone.0223601)
Supplement: S7 Table — (XLSX) [file pone.0223601.s007.xlsx]

## Sheet: S7
S7 Table. Sensitivity to assumptions1 among children
variable	Buffer	Ref OR2	Ref p3	Border4	distfarm<505	Farm6	fully-registered7	adj-registered8	excl. newborns9
n10		16673		15292	16920	17567	13064	16673	14987
Goats	500	1.61	0.11	0.0115	0.0292	-0.0702	0.0564	0.0108	-0.0186
	1000	1.29	0.07	0.0005	1.55% *	1.64% *	-0.0642	-0.0252	-0.0418
	1500	1.27	0.02	0.0242	0.0227	0.0012	-4.30% ns	-0.008	0.0162
	2000	1.15	0.14	0.0022	0.0201	0.0093	0	-0.0008	-0.0007
Poultry	500	0.98	0.87	0.0086	-0.0762	-0.1134	-0.01	-0.009	-0.048
	1000	1.12	0.2	-0.0037	-0.0021	-0.0168	0.0636	-0.0044	-0.0052
	1500	0.9	0.31	0.0024	-0.0079	-0.0444	-0.0102	0.0333	-0.0096
	2000	1.12	0.54	-0.0366	0.018	-0.041	-0.1204	0.0244	-0.0642
Chickens	500	0.96	0.79	0.0051	-0.0949	-0.1271	-0.0067	-0.0131	-0.0405
	1000	1.2	0.04	0.0038	-0.0001	-2.46% ns	0.0675	-1.44% ns	-1.43% ns
	1500	1	0.98	0.0108	-0.007	-0.0407	0.0214	0.0075	-0.0124
	2000	1.19	0.34	0.0898	0.0157	-0.0329	-0.1009	-0.0089	-0.0644
Laying hens and parent stock	500	1.07	0.67	0.0323	-0.0797	-0.1428	0.0365	0.0196	-0.0343
	1000	1.23	0.02	0.0119	0.0101	-0.0141	0.0989	-0.0099	0.0049
	1500	1.18	0.08	0.0251	-0.0068	-0.0266	0.0006	-0.0038	-0.0139
	2000	1.26	0.09	6.12% *	0.0125	0.0001	-0.0425	0.0014	-0.013
Broilers	500	0.6	0.13	-0.1754	-19.18% *	-0.1018	-0.1245	-0.0941	-0.0459
	1000	0.92	0.55	-0.0022	-0.0047	-0.0154	-0.0577	-0.0175	-0.0586
	1500	0.85	0.09	0.0057	-0.003	-2.15% *	0.0517	0.0046	-0.0052
	2000	1.01	0.91	0.0187	-0.0034	-0.0326	-0.0235	-0.008	-0.0378
1. In these analyses selection criteria and model formulation of the main analyses (indicated in column Ref OR and Ref p), were alterred to see the effects on the odds-ratio (indicated as percentage of change)
2. Ref OR: odds-ratio for reference decisions (children, patients living on a farm excluded, adjusted for age (linear) and gender).
3. Ref p: p-value for reference decisions.
4. border: residents living close to the border with other provinces or countries excluded.
5. distfarm<50: residents living within 50 meter from a farm with minimum number of animals excluded instead of residents assumed living on a farm
6. farm: residents assumed living on a farm not excluded.
7. fully-registered: only residents registered at a participating GP-practice for 3 full years included
8. adj-registered: linearly adjusted for the time registered at a participating GP-practice (3-month intervals)
9. excl. newborns: excluding children born in the study-period.
10. n: number of patients included.
*odds-ratio is not significant in the reference but p<0.05 for alternative decision.
ns: an odds-ratio is significant in the reference but not for the alternative decision.
